# Supplementary material for: Genetic Analysis of Sinonasal Undifferentiated Carcinoma Discovers Recurrent SWI/SNF Alterations and a novel PGAP3-SRPK1 Fusion Gene
Source: Research Square preprint supplement (doi:10.21203/rs.3.rs-115402/v1), 2020-12-28
Supplement: Supplementary file 1 [file 071e75d779ea8a997aff44ce.docx]

|  | | **Surgery +/- C/RT (%)** | **C/RT (%)** |
| --- | --- | --- | --- |
| (n=23) | (n=23) |
| **Age (yr)** |  | 54.4 | 54.5 |
| **Sex** | Female | 10 | 4 |
| Male | 13 | 18 |
| **Ethnicity** | Caucasian | 16 | 15 |
| Black | 0 | 0 |
| Asian | 1 | 1 |
| **Tumor Site** | Nasal Cavity | 12 | 5 |
| Maxillary | 1 | 4 |
| Ethmoid | 7 | 10 |
| Sella | 1 | 1 |
| Cribriform Plate | 1 | 1 |
| Larynx | 0 | 1 |
| **Overall Stage** | II | 1 | 0 |
| III | 3 | 2 |
| IV | 18 | 20 |
| **T stage** | II | 2 | 0 |
| III | 2 | 3 |
| IV | 18 | 19 |
| **Tobacco** | Never | 17 | 9 |
| Former | 2 | 8 |
| Current | 3 | 5 |
