# Supplementary material for: Genetic Analysis of Sinonasal Undifferentiated Carcinoma Discovers Recurrent SWI/SNF Alterations and a novel PGAP3-SRPK1 Fusion Gene
Source: Research Square preprint supplement (doi:10.21203/rs.3.rs-115402/v1), 2020-12-28
Supplement: Supplementary file 6 [file 738439356764b731d7b7f891.xlsx]

## Sheet: SNUC_Fusion knockdown
Negative
NAME	SIZE	ES	NES	NOM p-val	FDR q-val	FWER p-val	RANK AT MAX	LEADING EDGE
KOBAYASHI_EGFR_SIGNALING_24HR_DN	249	-0.860429	-2.04148	0	0	0	5610	tags=84%, list=10%, signal=92%
DUTERTRE_ESTRADIOL_RESPONSE_24HR_UP	313	-0.84431	-2.00737	0	0	0	5041	tags=73%, list=9%, signal=80%
HALLMARK_E2F_TARGETS	197	-0.858651	-1.97883	0	0	0	5431	tags=85%, list=10%, signal=94%
ROSTY_CERVICAL_CANCER_PROLIFERATION_CLUSTER	135	-0.880882	-1.95303	0	0	0	5014	tags=90%, list=9%, signal=98%
ZHOU_CELL_CYCLE_GENES_IN_IR_RESPONSE_24HR	119	-0.877244	-1.94942	0	0	0	4704	tags=83%, list=8%, signal=91%
FLORIO_NEOCORTEX_BASAL_RADIAL_GLIA_DN	181	-0.847229	-1.9375	0	0	0	5618	tags=74%, list=10%, signal=82%
SOTIRIOU_BREAST_CANCER_GRADE_1_VS_3_UP	149	-0.857231	-1.92966	0	0	0	4334	tags=80%, list=8%, signal=86%
RUIZ_TNC_TARGETS_DN	140	-0.846838	-1.92539	0	0	0	4361	tags=74%, list=8%, signal=80%
SHEDDEN_LUNG_CANCER_POOR_SURVIVAL_A6	445	-0.789178	-1.92417	0	0	0	7703	tags=72%, list=14%, signal=82%
PUJANA_XPRSS_INT_NETWORK	162	-0.83555	-1.91871	0	0	0	6460	tags=80%, list=12%, signal=90%
ZHOU_CELL_CYCLE_GENES_IN_IR_RESPONSE_6HR	80	-0.90285	-1.91538	0	0.000121466	0.001	3577	tags=88%, list=6%, signal=93%
CROONQUIST_IL6_DEPRIVATION_DN	93	-0.881264	-1.91521	0	0.000111344	0.001	4646	tags=85%, list=8%, signal=92%
KONG_E2F3_TARGETS	96	-0.88206	-1.91198	0	0.000102779	0.001	4258	tags=82%, list=8%, signal=89%
HALLMARK_MYC_TARGETS_V1	197	-0.829227	-1.90896	0	9.54378e-05	0.001	7921	tags=88%, list=14%, signal=102%
SARRIO_EPITHELIAL_MESENCHYMAL_TRANSITION_UP	179	-0.82222	-1.90213	0	0.000177949	0.002	6275	tags=74%, list=11%, signal=83%
FUJII_YBX1_TARGETS_DN	189	-0.833265	-1.90133	0	0.000166827	0.002	5596	tags=75%, list=10%, signal=83%
GRAHAM_CML_DIVIDING_VS_NORMAL_QUIESCENT_UP	182	-0.824037	-1.89685	0	0.000234746	0.003	5222	tags=68%, list=9%, signal=75%
WONG_EMBRYONIC_STEM_CELL_CORE	327	-0.795253	-1.89521	0	0.000221705	0.003	7903	tags=80%, list=14%, signal=92%
WHITEFORD_PEDIATRIC_CANCER_MARKERS	113	-0.8629	-1.89477	0	0.000210036	0.003	4540	tags=81%, list=8%, signal=88%
BURTON_ADIPOGENESIS_3	100	-0.877177	-1.89342	0	0.000199534	0.003	3869	tags=78%, list=7%, signal=84%
HORIUCHI_WTAP_TARGETS_DN	304	-0.795946	-1.89208	0	0.000254314	0.004	6289	tags=67%, list=11%, signal=76%
HALLMARK_G2M_CHECKPOINT	192	-0.820325	-1.88522	0	0.000303023	0.005	5473	tags=73%, list=10%, signal=81%
FISCHER_G2_M_CELL_CYCLE	225	-0.806675	-1.87746	0	0.000406428	0.007	5569	tags=68%, list=10%, signal=76%
MANALO_HYPOXIA_DN	281	-0.800167	-1.87268	0	0.000445804	0.008	6873	tags=75%, list=12%, signal=85%
FOURNIER_ACINAR_DEVELOPMENT_LATE_2	275	-0.789857	-1.8724	0	0.000427972	0.008	6479	tags=70%, list=12%, signal=79%
WINNEPENNINCKX_MELANOMA_METASTASIS_UP	157	-0.832478	-1.86942	0	0.000462657	0.009	5070	tags=74%, list=9%, signal=81%
MISSIAGLIA_REGULATED_BY_METHYLATION_DN	119	-0.839932	-1.86298	0	0.000495177	0.01	5436	tags=78%, list=10%, signal=86%
BENPORATH_PROLIFERATION	143	-0.833189	-1.85563	0	0.000716772	0.015	7060	tags=80%, list=13%, signal=91%
GRAHAM_NORMAL_QUIESCENT_VS_NORMAL_DIVIDING_DN	87	-0.870084	-1.85386	0	0.000876091	0.019	4114	tags=79%, list=7%, signal=85%
CROONQUIST_NRAS_SIGNALING_DN	69	-0.887415	-1.84672	0	0.00107139	0.024	5531	tags=94%, list=10%, signal=104%
TARTE_PLASMA_CELL_VS_PLASMABLAST_DN	297	-0.776353	-1.84534	0	0.0010808	0.025	6775	tags=67%, list=12%, signal=76%
MARKEY_RB1_ACUTE_LOF_UP	225	-0.794844	-1.84288	0	0.00121428	0.029	5197	tags=67%, list=9%, signal=73%
CSR_LATE_UP.V1_UP	162	-0.804408	-1.83856	0	0.00142013	0.034	6455	tags=67%, list=12%, signal=75%
LEE_EARLY_T_LYMPHOCYTE_UP	103	-0.844432	-1.83809	0	0.00137837	0.034	5218	tags=70%, list=9%, signal=77%
PUJANA_BRCA2_PCC_NETWORK	413	-0.765361	-1.83611	0	0.0013774	0.035	6310	tags=62%, list=11%, signal=70%
HOFFMANN_LARGE_TO_SMALL_PRE_BII_LYMPHOCYTE_UP	147	-0.808367	-1.83408	0	0.00145075	0.038	5041	tags=72%, list=9%, signal=79%
ISHIDA_E2F_TARGETS	52	-0.912592	-1.83089	0	0.00173741	0.047	3014	tags=88%, list=5%, signal=93%
BASAKI_YBX1_TARGETS_UP	279	-0.779518	-1.83051	0	0.00172695	0.048	7060	tags=68%, list=13%, signal=78%
PUJANA_BRCA_CENTERED_NETWORK	115	-0.839572	-1.82242	0	0.00230162	0.065	6460	tags=82%, list=12%, signal=92%
GO_NUCLEOSOME_ORGANIZATION	177	-0.790921	-1.82077	0	0.00237822	0.069	6902	tags=59%, list=12%, signal=67%
BLUM_RESPONSE_TO_SALIRASIB_DN	331	-0.757209	-1.81126	0	0.00313719	0.09	6997	tags=67%, list=13%, signal=76%
MITSIADES_RESPONSE_TO_APLIDIN_DN	243	-0.775149	-1.80678	0	0.0037625	0.11	6143	tags=64%, list=11%, signal=72%
GO_DNA_PACKAGING	202	-0.78491	-1.80601	0	0.00386188	0.116	5614	tags=56%, list=10%, signal=63%
LI_WILMS_TUMOR_VS_FETAL_KIDNEY_1_DN	159	-0.799331	-1.8045	0	0.00401763	0.122	6873	tags=68%, list=12%, signal=77%
LINDGREN_BLADDER_CANCER_CLUSTER_3_UP	314	-0.752901	-1.80353	0	0.00410613	0.128	7117	tags=64%, list=13%, signal=73%
MORI_LARGE_PRE_BII_LYMPHOCYTE_UP	84	-0.858554	-1.80251	0	0.0041621	0.133	5481	tags=83%, list=10%, signal=92%
FURUKAWA_DUSP6_TARGETS_PCI35_DN	70	-0.849013	-1.80219	0	0.00407355	0.133	5520	tags=77%, list=10%, signal=85%
MORI_IMMATURE_B_LYMPHOCYTE_DN	89	-0.850928	-1.79616	0	0.0053262	0.174	5481	tags=89%, list=10%, signal=98%
RHODES_UNDIFFERENTIATED_CANCER	67	-0.861215	-1.79437	0	0.00568209	0.189	4770	tags=78%, list=9%, signal=85%
CHIANG_LIVER_CANCER_SUBCLASS_PROLIFERATION_UP	171	-0.788444	-1.79113	0	0.00618353	0.208	5368	tags=64%, list=10%, signal=70%
KANG_DOXORUBICIN_RESISTANCE_UP	51	-0.899314	-1.78936	0	0.00658894	0.226	3842	tags=94%, list=7%, signal=101%
VANTVEER_BREAST_CANCER_METASTASIS_DN	124	-0.811122	-1.78693	0	0.00718418	0.247	5735	tags=72%, list=10%, signal=80%
GO_CHROMATIN_ASSEMBLY	161	-0.79744	-1.78571	0	0.00742811	0.257	5614	tags=59%, list=10%, signal=65%
BENPORATH_ES_1	362	-0.739308	-1.78439	0	0.00791124	0.274	6471	tags=56%, list=12%, signal=63%
FERREIRA_EWINGS_SARCOMA_UNSTABLE_VS_STABLE_UP	155	-0.789413	-1.7811	0	0.00888899	0.308	5573	tags=63%, list=10%, signal=70%
GARY_CD5_TARGETS_DN	420	-0.738202	-1.77793	0	0.0100211	0.341	8368	tags=69%, list=15%, signal=81%
GO_RIBOSOME_BIOGENESIS	264	-0.760113	-1.77711	0	0.0101055	0.35	8718	tags=80%, list=16%, signal=95%
BOYAULT_LIVER_CANCER_SUBCLASS_G3_UP	187	-0.767442	-1.77377	0	0.011223	0.392	8365	tags=71%, list=15%, signal=83%
GARCIA_TARGETS_OF_FLI1_AND_DAX1_DN	160	-0.782586	-1.77364	0	0.0110781	0.394	5992	tags=64%, list=11%, signal=71%
GO_DNA_REPLICATION	261	-0.74777	-1.77279	0	0.0112946	0.406	7835	tags=67%, list=14%, signal=77%
NAKAMURA_TUMOR_ZONE_PERIPHERAL_VS_CENTRAL_UP	276	-0.744553	-1.7697	0	0.0122743	0.437	7954	tags=67%, list=14%, signal=77%
KAMMINGA_EZH2_TARGETS	41	-0.902337	-1.76703	0	0.0131983	0.464	4037	tags=88%, list=7%, signal=95%
VECCHI_GASTRIC_CANCER_EARLY_UP	417	-0.73318	-1.76685	0	0.013095	0.466	7512	tags=64%, list=13%, signal=73%
GO_REGULATION_OF_GENE_SILENCING	148	-0.783548	-1.76505	0	0.0137284	0.493	7524	tags=66%, list=13%, signal=76%
LY_AGING_OLD_DN	54	-0.882307	-1.76466	0	0.0137855	0.5	5221	tags=87%, list=9%, signal=96%
SONG_TARGETS_OF_IE86_CMV_PROTEIN	54	-0.882181	-1.76432	0	0.0136986	0.501	4320	tags=81%, list=8%, signal=88%
GO_VIRAL_GENE_EXPRESSION	189	-0.766342	-1.76416	0	0.013534	0.502	8538	tags=77%, list=15%, signal=91%
PUJANA_BREAST_CANCER_WITH_BRCA1_MUTATED_UP	55	-0.872085	-1.76284	0	0.0137695	0.516	4992	tags=82%, list=9%, signal=90%
GO_CHROMATIN_ASSEMBLY_OR_DISASSEMBLY	187	-0.769433	-1.76169	0	0.0141704	0.528	6902	tags=60%, list=12%, signal=69%
REN_BOUND_BY_E2F	62	-0.856471	-1.75841	0	0.0160143	0.576	4992	tags=87%, list=9%, signal=96%
LEE_LIVER_CANCER_SURVIVAL_DN	174	-0.767488	-1.75823	0	0.0158824	0.578	7303	tags=67%, list=13%, signal=77%
ZHAN_MULTIPLE_MYELOMA_PR_UP	45	-0.88659	-1.75625	0	0.0168174	0.602	5462	tags=89%, list=10%, signal=98%
TANG_SENESCENCE_TP53_TARGETS_DN	55	-0.869395	-1.75624	0	0.0166053	0.603	4192	tags=75%, list=8%, signal=81%
GO_RNA_LOCALIZATION	225	-0.763458	-1.75603	0	0.0164898	0.605	8964	tags=74%, list=16%, signal=88%
RHEIN_ALL_GLUCOCORTICOID_THERAPY_DN	358	-0.732791	-1.75365	0	0.0176455	0.637	7674	tags=66%, list=14%, signal=77%
GO_DNA_CONFORMATION_CHANGE	294	-0.743969	-1.75365	0	0.0174133	0.637	5614	tags=53%, list=10%, signal=59%
MOLENAAR_TARGETS_OF_CCND1_AND_CDK4_DN	53	-0.873384	-1.75314	0	0.0176048	0.648	5884	tags=85%, list=11%, signal=95%
GO_RIBOSOMAL_LARGE_SUBUNIT_BIOGENESIS	66	-0.831795	-1.75271	0.00156495	0.0174654	0.65	7193	tags=83%, list=13%, signal=96%
WHITFIELD_CELL_CYCLE_G2_M	189	-0.756415	-1.75266	0	0.0172956	0.653	6862	tags=58%, list=12%, signal=66%
BIDUS_METASTASIS_UP	211	-0.761412	-1.75254	0	0.0171462	0.654	5752	tags=63%, list=10%, signal=69%
MUELLER_PLURINET	296	-0.736595	-1.74905	0	0.0187883	0.686	8040	tags=69%, list=14%, signal=80%
KAUFFMANN_MELANOMA_RELAPSE_UP	61	-0.849795	-1.74834	0.00154321	0.0190017	0.694	4567	tags=75%, list=8%, signal=82%
WANG_RESPONSE_TO_GSK3_INHIBITOR_SB216763_DN	348	-0.736374	-1.74721	0	0.019484	0.707	6199	tags=57%, list=11%, signal=64%
GO_PROTEIN_DNA_COMPLEX_SUBUNIT_ORGANIZATION	276	-0.738748	-1.74316	0	0.0216963	0.754	7835	tags=57%, list=14%, signal=65%
BHATTACHARYA_EMBRYONIC_STEM_CELL	82	-0.818038	-1.74303	0	0.0215831	0.758	6205	tags=65%, list=11%, signal=73%
GO_COTRANSLATIONAL_PROTEIN_TARGETING_TO_MEMBRANE	102	-0.798635	-1.74235	0	0.0216276	0.763	9602	tags=87%, list=17%, signal=105%
VERNELL_RETINOBLASTOMA_PATHWAY_UP	69	-0.842745	-1.74126	0	0.0220413	0.777	6690	tags=87%, list=12%, signal=99%
SCHLOSSER_MYC_TARGETS_REPRESSED_BY_SERUM	156	-0.773775	-1.74125	0	0.0217908	0.777	9152	tags=81%, list=16%, signal=96%
GO_ESTABLISHMENT_OF_RNA_LOCALIZATION	192	-0.755177	-1.73607	0	0.0250093	0.829	7697	tags=68%, list=14%, signal=78%
GO_RNA_EXPORT_FROM_NUCLEUS	136	-0.779992	-1.73239	0	0.0273797	0.85	9982	tags=82%, list=18%, signal=99%
GO_DNA_DEPENDENT_DNA_REPLICATION	139	-0.778844	-1.73224	0	0.027123	0.851	6738	tags=73%, list=12%, signal=82%
GO_TELOMERE_ORGANIZATION	170	-0.758561	-1.7262	0	0.0316932	0.895	6460	tags=64%, list=12%, signal=72%
HALLMARK_MYC_TARGETS_V2	58	-0.836816	-1.722	0.00147275	0.0351439	0.925	6804	tags=84%, list=12%, signal=96%
FISCHER_G1_S_CELL_CYCLE	194	-0.742485	-1.72109	0	0.0356972	0.935	5359	tags=58%, list=10%, signal=64%
GO_TRANSLATIONAL_INITIATION	190	-0.74768	-1.71587	0	0.0406153	0.963	8967	tags=77%, list=16%, signal=92%
GO_REGULATION_OF_POSTTRANSCRIPTIONAL_GENE_SILENCING	113	-0.780748	-1.71341	0	0.0426214	0.97	7524	tags=68%, list=13%, signal=79%
GOLDRATH_ANTIGEN_RESPONSE	342	-0.717124	-1.71265	0	0.0430669	0.97	6605	tags=55%, list=12%, signal=62%
ODONNELL_TARGETS_OF_MYC_AND_TFRC_DN	44	-0.864918	-1.71255	0.00155763	0.0427492	0.97	5366	tags=84%, list=10%, signal=93%
GO_RRNA_METABOLIC_PROCESS	194	-0.743997	-1.70927	0	0.0457665	0.975	8138	tags=77%, list=15%, signal=90%
LE_EGR2_TARGETS_UP	105	-0.784478	-1.70644	0.0046083	0.0487646	0.979	3071	tags=55%, list=5%, signal=58%
