# Supplementary material for: Genetic Analysis of Sinonasal Undifferentiated Carcinoma Discovers Recurrent SWI/SNF Alterations and a novel PGAP3-SRPK1 Fusion Gene
Source: Research Square preprint supplement (doi:10.21203/rs.3.rs-115402/v1), 2020-12-28
Supplement: Supplementary file 11 [file bd3ec7bfdaac4015b33026fd.xlsx]

## Sheet: Sheet1
Tumor	Microsatellie Status
	Total_Number_of_Sites	Number_of_Somatic_Sites	%	Instable (% >3.5)
SNUC1	349	23	6.59	Yes
SNUC2	421	21	4.99	Yes
SNUC3	356	51	14.33	Yes
SNUC4	425	30	7.06	Yes
SNUC5	374	26	6.95	Yes
SNUC6	385	13	3.38	Yes
SNUC7	408	10	2.45	No
SNUC8	419	3	0.72	No
SNUC9	467	14	3	No
SNUC10	371	9	2.43	No
