# Supplementary material for: Genetic Analysis of Sinonasal Undifferentiated Carcinoma Discovers Recurrent SWI/SNF Alterations and a novel PGAP3-SRPK1 Fusion Gene
Source: Research Square preprint supplement (doi:10.21203/rs.3.rs-115402/v1), 2020-12-28
Supplement: Supplementary file 18 [file 8a6ec7ce3f56a895c3f1aa29.docx]

| Target | Sequence |
| --- | --- |
| SRPK1 | F: TGGAAATGCTTGTTGGGTGC  R: CCAAATGTCAGCAGGGGTAT |
| PGAP3-SRPK1 | F: CTGTAAGTATGAGTGTATGTGGGT  R: CCAAATGTCAGCAGGGGTAT |
| GAPDH | F: GAAGACGGGCGGAGAGAAAC  R: CGACCAAATCCGTTGACTCC |
| HSDL2 | F: TTATCACAGGTGCAAGCCGT  R: CTGCTTCAATTTCTTCAGCAGC |
| CCND1 | F: GATCAAGTGTGACCCGGACT  R: CTTGGGGTCCATGTTCTGCT |
| FOXO4 | F: GGGAAAAGGCCATTGAAAGCG  R: ATGAACTTGCTGTGCAGGGA |
| NAGK | F: CCGCGATCTATGGGGGTGTA  R: TGTGCTCAGTCCATCTGCTT |
| LINC01006 | F: GTCGAGGGCAGTTTTCTGGG  R: AACACAACCCGCAACGAGAA |
| BETA ACTIN | F: CGGCGCCCTATAAAACCCA  R: TCATCATCCATGGTGAGCTGG |
| HRPT | F: CCTGGCGTCGTGATTAGTGA  R: CGAGCAAGACGTTCAGTCCT |
| RPL19 | F: AGCTCTTTCCTTTCGCTGCT  R: GATCTGCTGACGGGAGTTGG |
