# Supplementary material for: Genetic Analysis of Sinonasal Undifferentiated Carcinoma Discovers Recurrent SWI/SNF Alterations and a novel PGAP3-SRPK1 Fusion Gene
Source: Research Square preprint supplement (doi:10.21203/rs.3.rs-115402/v1), 2020-12-28
Supplement: Supplementary file 20 [file d608c626039ffd19c816a222.xlsx]

## Sheet: Sheet1
GEMs Detected	1309669
N50 Linked-Reads per Molecule (LPM)	94
Mean DNA per GEM	471,928 bp
Molecule Length	μ 123,740 bp
DNA in Molecules >20kb	0.961
DNA in Molecules >100kb	0.58
Corrected Estimated of DNA Loaded	1.11 ng
Number of Reads	848842686
Median Insert Size	361 bp
Mean Depth	36.9 X
Zero Coverage	0.00865
Mapped Reads	0.958
PCR Duplication	0.0455
Q30 bases, Read 1	0.896
Q30 bases, Read 2	0.866
