# Supplementary material for: Genetic Analysis of Sinonasal Undifferentiated Carcinoma Discovers Recurrent SWI/SNF Alterations and a novel PGAP3-SRPK1 Fusion Gene
Source: Research Square preprint supplement (doi:10.21203/rs.3.rs-115402/v1), 2020-12-28
Supplement: Supplementary file 21 [file f9f3e795cc296bf6c2d5b59f.xlsx]

## Sheet: Sheet1
SNUC	Sample	Total reads	%mapped	%uniquely mapped
SNUC-1 (tumor)	78021	238333027	99.93	83.36
SNUC-1 (normal)	78022	315546090	99.94	85.5
SNUC-2 (tumor)	78023	273897967	99.94	84.32
SNUC-2(Normal)	78024	241749680	99.94	84.23
SNUC-5 (tumor)	78029	228610472	99.93	85.66
SNUC 5 (normal)	78030	303208220	99.95	87.04
SNUC 8 (tumor)	78035	244302232	99.92	86.23
SNUC 8 (normal)	78036	208331805	99.93	86.76
SNUC 10 (tumor)	78039	304588671	99.93	82.67
SNUC 10 (normal)	78040	204956768	99.93	86.83
